# Supplementary material for: A multi-country non-inferiority experimental hut evaluation of DuraNet® Plus, an alpha-cypermethrin and piperonyl butoxide treated net, for control of pyrethroid-resistant malaria vectors in West and Central Africa
Source: Research Square preprint supplement (doi:10.21203/rs.3.rs-6848690/v1), 2025-09-30
Supplement: Supplementary file 1 [file 019de766fc811df6f494dc87.docx]

**Supplementary information**

**A multi-country non-inferiority experimental hut evaluation of DuraNet® Plus, an alpha-cypermethrin and piperonyl butoxide treated net, for control of pyrethroid-resistant malaria vectors in West and Central Africa**

Abel Agbevo1,2,3,4, Judicael Nounagnon1,2,4, Benjamin Menze5, Loudovic Ahoua Alou6, Achille Binyang5, Boris N’dombidje1,2,4, Charles Wondji5,7, Raphael N’Guessan3,6, Corine Ngufor1,2,3,4*

| **Treatment** | **Untreated Net** | **DuraNet** | | **Olyset Plus** | | **DuraNet Plus** | |
| --- | --- | --- | --- | --- | --- | --- | --- |
| **Number of washes** | **n/a** | **Unwashed** | **20 washes** | **Unwashed** | **20 washes** | **Unwashed** | **20 washes** |
| *An gambiae sl* in Cove, Benin | | | | | | | |
| Total females caught | 723 | 814 | 866 | 1139 | 1200 | 599 | 674 |
| N dead 24 h | 9 | 162 | 178 | 182 | 150 | 187 | 187 |
| 24 h mortality (%) | 1.2 | 20 | 20.5 | 16 | 12.5 | 31.2 | 27.7 |
| 24 h mortality 95% Cls | (0.4-2.0) | (17.1-22.6) | (17.8-23.2) | (13.8-18.1) | (10.6-14.3) | (27.5-34.9) | (24.3-31.1) |
| Total exiting | 375 | 587 | 645 | 847 | 693 | 488 | 518 |
| Exiting (%) | 51.8 | 72.1 | 74.4 | 74.3 | 57.7 | 81.4 | 76.8 |
| Exiting 95% CIs | (48.1-55.4) | (69.0-75.1) | (71.4-77.3) | (71.7-76.8) | (54.9-60.5) | (78.2-84.5) | (73.6-80) |
| N Blood-feeding | 366 | 183 | 237 | 294 | 523 | 63 | 100 |
| Blood-feeding (%) | 50.6 | 22.4 | 27.3 | 27.8 | 43.5 | 10.5 | 14.8 |
| Blood-feeding 95% Cls | (47.0-54.2) | (19.6-25.3) | (24.4-30.3) | (23.2-28.3) | (40.7-46.3) | (8.0-13) | (12.1-17.5) |
| Blood-feeding inhibition (%) | - | 55.5 | 45.9 | 49 | 13.9 | 79.2 | 70.6 |
| *An funestus* in Mibellon, Cameroon | | | | | | | |
| Total females caught | 618 | 286 | 342 | 306 | 363 | 283 | 297 |
| N dead 24 h | 27 | 40 | 41 | 91 | 53 | 93 | 68 |
| 24 h mortality (%) | 4.3 | 13.9 | 11.9 | 29.7 | 14.6 | 32.8 | 22.8 |
| 24 h mortality 95% Cls | (2.7-5.9) | (9.9-18.0) | (8.5-15.4) | (24.6-34.8) | (10.9-18.2) | (27.3-38.3) | (18.1-27.6) |
| Total exiting | 120 | 99 | 80 | 96 | 99 | 81 | 86 |
| Exiting (%) | 19.4 | 34.6 | 23.3 | 31.3 | 27.2 | 28.6 | 28.9 |
| Exiting 95% CIs | (16.3-22.5) | (29.1-40.1) | (18.9-27.8) | (26.1-36.5) | (22.6-31.8) | (23.3-33.8) | (23.8-34.1) |
| N Blood-feeding | 410 | 118 | 147 | 133 | 164 | 97 | 105 |
| Blood-feeding (%) | 66.3 | 41.2 | 42.9 | 43.4 | 45.1 | 34.2 | 35.3 |
| Blood-feeding 95% Cls | (62.6-70.0) | (35.5-46.9) | (37.7-48.2) | (37.9-49.0) | (40.0-50.3) | (28.7-39.8) | (29.9-40.7) |
| Blood-feeding inhibition (%) | - | 37.8 | 35.2 | 34.4 | 31.9 | 48.3 | 46.7 |
| *An gambiae sl* in Mbe, Cote D'Ivoire | | | | | | | |
| Total females caught | 1366 | 725 | 1017 | 908 | 1036 | 785 | 854 |
| N dead 24 h | 58 | 89 | 71 | 139 | 89 | 192 | 123 |
| 24 h mortality (%) | 1 | 2.3 | 1.5 | 2.3 | 1.7 | 3 | 2.3 |
| 24 h mortality 95% Cls | (3.1-5.3) | (9.8-14.6) | (5.4-8.5) | (12.9-17.6) | (6.8-10.3) | (21.4-27.4) | (12.0-16.7) |
| N Exophily | 566 | 387 | 575 | 561 | 547 | 517 | 503 |
| Exophily (%) | 41.4 | 53.3 | 56.5 | 61.7 | 52.7 | 65.8 | 58.8 |
| Exophily 95% CIs | (38.8-44.0) | 49.75-57.0) | (53.4-59.5) | (58.6-64.9) | (49.7-55.8) | 6(2.5-69.1) | (55.6-62.2) |
| N Blood-feeding | 532 | 189 | 273 | 123 | 378 | 139 | 150 |
| Blood-feeding (%) | 38.9 | 26 | 26.8 | 13.5 | 36.4 | 17.7 | 17.5 |
| Blood-feeding 95% Cls | (36.3-41.5) | (22.8-29.2) | (24.1-29.5) | (11.3-15.7) | (33.5-39.4) | (15.0-20.3) | (15.0-20.1) |
| Blood-feeding inhibition (%) | - | 33 | 31 | 65.2 | 6.3 | 54.5 | 54.9 |

**Table S1:** Detailed results from experimental hut trials evaluating the efficacy of DuraNet® Plus against pyrethroid-resistant malaria vectors in Benin, Cameroon, and Côte d’Ivoire.

**Table S2:** Detailed results from the non-inferiority assessment comparing DuraNet® Plus to Olyset® Plus for mosquito mortality and blood-feeding outcomes against wild pyrethroid-resistant malaria vectors in experimental hut trials conducted in Covè (Benin), Mibellon (Cameroon), and M’bé (Côte d’Ivoire).

|  |  | **Unwashed** | | **Washed 20X** | | **Pooled** | |
| --- | --- | --- | --- | --- | --- | --- | --- |
|  |  | Odds ratio | NIM | Odds ratio | NIM | Odds ratio | NIM |
|  |  | (95% CIs) | (Outcome) | (95% CIs) | (Outcome) | (95% CIs) | (Outcome) |
| Bénin  (*An gambiae sl*) | Mortality | 2.636 | 0.518 | 3.000 | 0.407 | 2.809 | 0.468 |
| ( 2.027-3.427) | (Non-Inferior) | ( 2.311-3.894) | (Non-Inferior) | (2.339-3.375) | (Non-Inferior) |
| Blood-feeding | 0.277 | 1.403 | 0.192 | 1.325 | 0.225 | 1.345 |
| (0.202-0.379) | (Non-Inferior) | (0.1483-0.250) | (Non-Inferior) | (0.184-0.275) | (Non-Inferior) |
| Cameroon  (*An funestus*) | Mortality | 1.520 | 0.695 | 2.191 | 0.481 | 1.811 | 0.619 |
| ( 0.983-2.351) | (Non-Inferior) | ( 1.379-3.481) | (Non-Inferior) | (1.319-2.488) | (Non-Inferior) |
| Blood-feeding | 0.634 | 1.325 | 0.682 | 1.323 | 0.657 | 1.324 |
| (0.420-0.958) | (Non-Inferior) | ( 0.468-0.992) | (Non-Inferior) | ( 0.497-0.869) | (Non-Inferior) |
| Cote D'Ivoire (*An gambiae sl*) | Mortality | 2.458 | 0.501 | 2.043 | 0.171 | 2.277 | 0.373 |
| (1.871-3.229) | (Non-Inferior) | (1.485-2.809) | (Non-Inferior) | ( 1.853-2.799) | (Non-Inferior) |
| Blood-feeding | 1.303 | 1.650 | 0.335 | 1.339 | 0.579 | 1.404 |
| (0.975-1.741) | (Not non-Inferior) | (0.261-0.430) | (Non-Inferior) | (0.482-0.694) | (Non-Inferior) |
